# Supplementary material for: Large scale preparation of graphene quantum dots from graphite with tunable fluorescence properties
Source: Royal Society of Chemistry journal article supplement (doi:10.1039/c3cp50691f), 2013-01-01
Supplement: c3cp50691f.pdf [file c3cp50691f.pdf]

Supporting Information for

## Large Scale Preparation of Graphene Quantum Dots from Graphite with Tunable Fluorescence Properties

5 Yiqing Sun, Shiqi Wang, Chun Li, Peihui Luo, Lei Tao, Yen Wei, and Gaoquan Shi\*

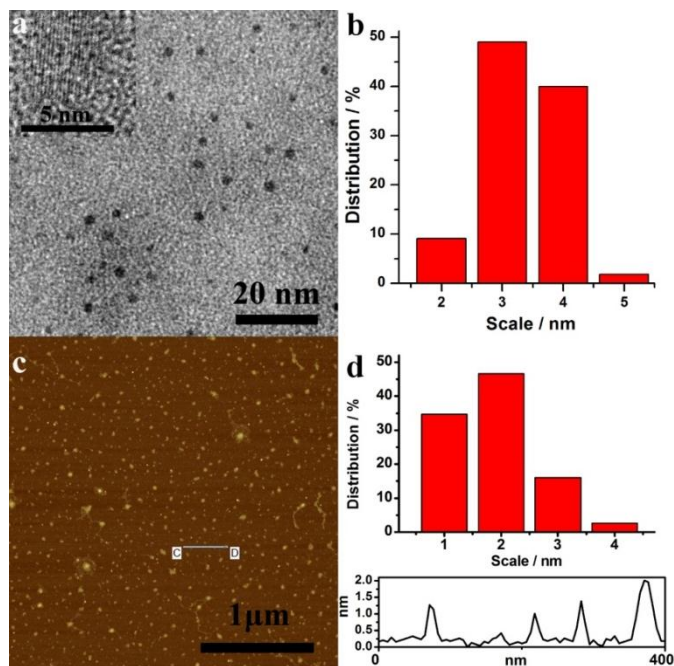

10 **Figure S1** (a) TEM images of GQDs<sub>100,12</sub>; inset: HRTEM image of GQDs<sub>100,12</sub>. (b) The size distribution of GQDs<sub>100,12</sub>. (c) AFM image of GQDs<sub>100,12</sub> with a height profile. (d) Histogram of GQDs<sub>100,12</sub> heights.

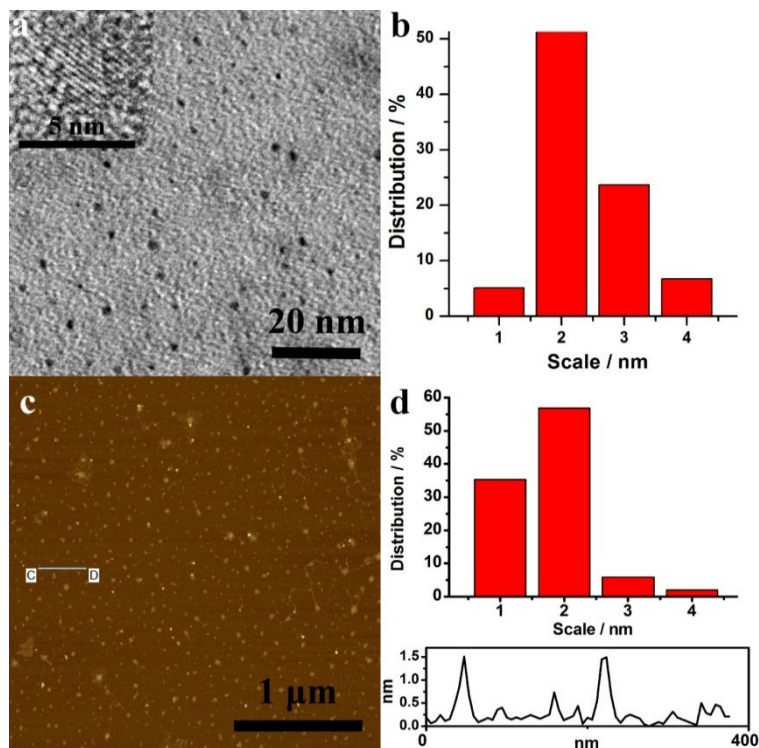

**Figure S2** (a) TEM images of GQDs<sub>160,12</sub>; the inset is the HRTEM of GQDs<sub>160,12</sub>. (b) The size distribution of GQDs<sub>160,12</sub>. (c) AFM image of GQDs<sub>160,12</sub> with a height profile. (d) Histogram of 5 GQDs<sub>160,12</sub> heights.

0.

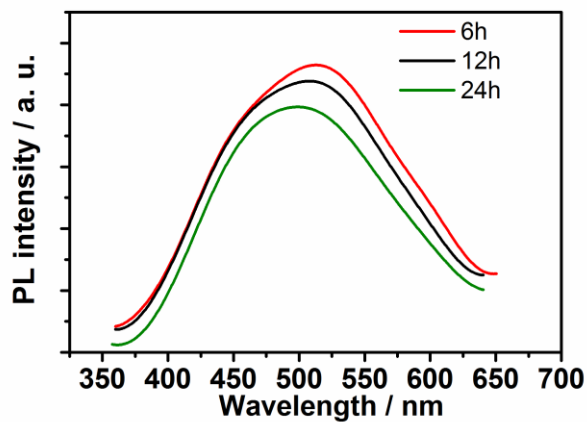

**Figure S3** PL spectra of the aqueous dispersions of GQDs<sub>100,6</sub>, GQDs<sub>100,12</sub> and GQDs<sub>100,24</sub> (excited at 340 nm).

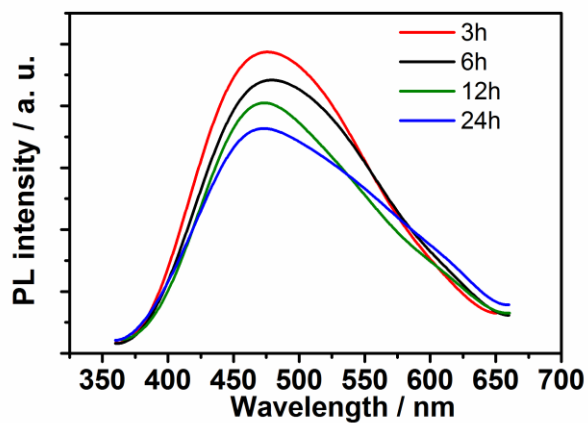

**Figure S4** PL spectras of the aqueous dispersions of GQDs<sub>120,3</sub>, GQDs<sub>120,6</sub>, GQDs<sub>120,12</sub>, and GQDs<sub>120,24</sub> (excited at 340 nm).

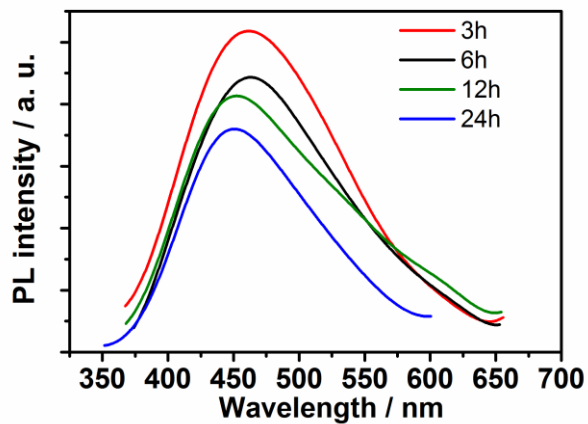

5

**Figure S5** PL spectra of the aqueous dispersions of GQD<sub>160,3</sub>, GQD<sub>160,6</sub>, GQD<sub>160,12</sub> and GQD<sub>160,24</sub> (excited at 340 nm).

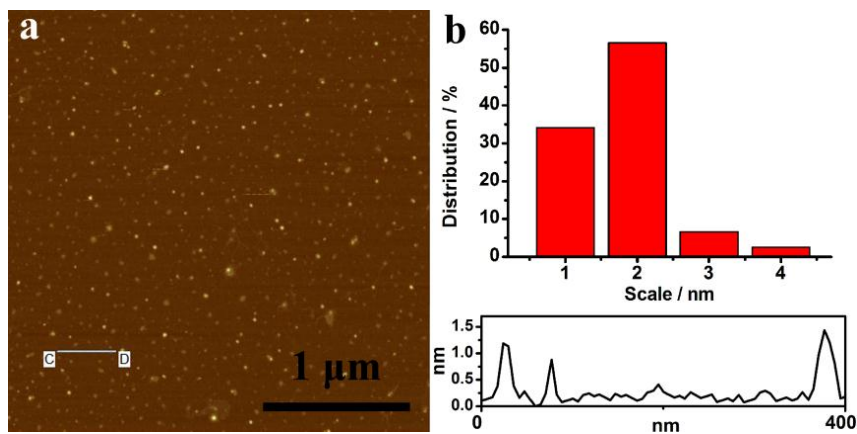

**Figure S6** (a) AFM image of HGQDs<sub>120,12</sub> and (b) their height distribution.

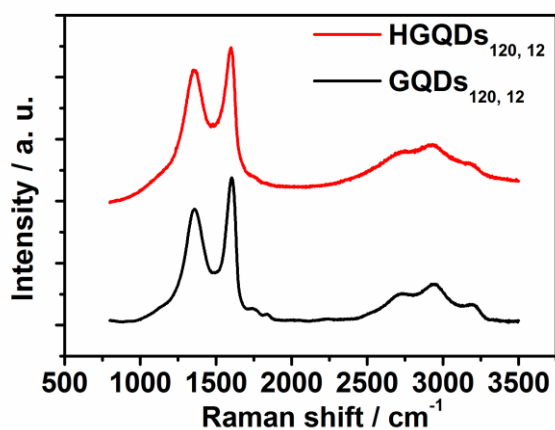

5

**Figure S7** Raman spectra of GQDs<sub>120,12</sub> and HGQDs<sub>120,12</sub>.

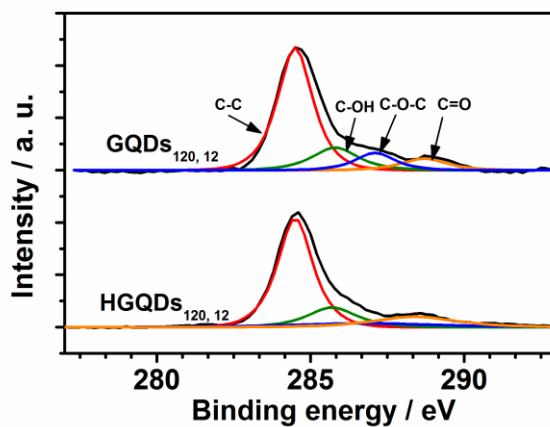

**Figure S8** C1s XPS spectra of GQDs<sub>120,12</sub> and HGQDs<sub>120,12</sub>.
